# Supplementary material for: GPR101 mediates the pro-resolving actions of RvD5n-3 DPA in arthritis and infections
Source: JCI journal article supplement (doi:10.1172/jci131609), 2019-12-02
Supplement: sd1 [file 1]

## **GPR101 mediates the pro-resolving actions of RvD5<sub>n-3</sub> DPA in arthritis and infections**

Magdalena B. Flak<sup>1</sup>, Duco S. Koenis<sup>1\*</sup>, Agua Sobrino<sup>1\*</sup>, James Smith<sup>1</sup>, Kimberly Pistorius<sup>1</sup>, Francesco Palmas<sup>1</sup>, Jesmond Dalli<sup>1, 2†</sup>.

\*share second authorship

<sup>1</sup> William Harvey Research Institute, Barts and The London School of Medicine and Dentistry, Queen Mary University of London, Charterhouse Square, London, EC1M 6BQ, UK.

<sup>2</sup> Centre for Inflammation and Therapeutic Innovation, Queen Mary University of London, London, UK.

†Corresponding author: Dr Jesmond Dalli Ph.D, Lipid Mediator Unit, William Harvey Research Institute, John Vane Science Centre, Charterhouse Square, London EC1M 6BQ. E-mail:

[j.dalli@qmul.ac.uk](mailto:j.dalli@qmul.ac.uk), Tel: +44 (0) 207 882 8263

### **Keywords:**

lipid mediators, resolvins, specialized pro-resolving mediators, rheumatoid arthritis, G-protein coupled receptor, omega-3

## Supplemental Figures

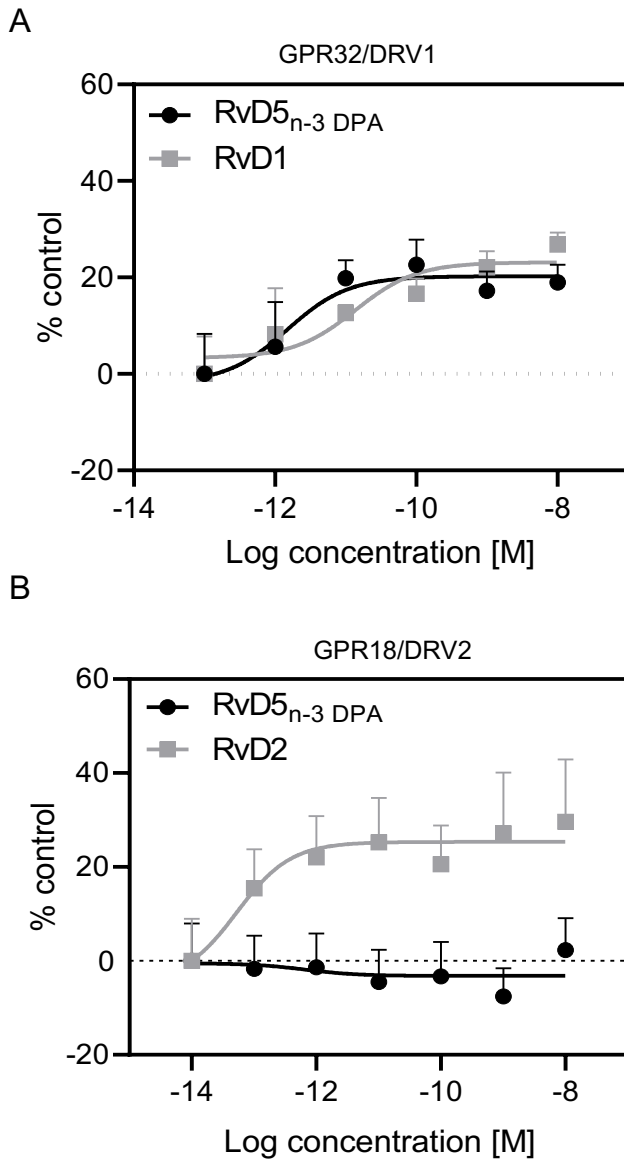

### Supplemental Figure 1: Interaction of RvD5<sub>n-3</sub> DPA with GPR32/DRV1 and GPR18/DRV2. (A)

CHO cells expressing GPR32 coupled with the  $\beta$ -arrestin luminescent reporter system were incubated with the indicated concentrations of RvD1 ( $EC_{50} \sim 1.4 \times 10^{-11}$  M), RvD5<sub>n-3</sub> DPA ( $EC_{50} \sim 1.5 \times 10^{-12}$  M), or vehicle (Cell Plating Reagent containing 0.01% ethanol) and receptor activation was measured as an increase in luminescence signal. (B) CHO cells expressing

GPR18 coupled with the  $\beta$ -arrestin luminescent reporter system were incubated with the indicated concentrations of RvD2 ( $EC_{50} \sim 5.3 \times 10^{-14}$  M), RvD5<sub>n-3 DPA</sub> (no response), or vehicle (Cell Plating Reagent containing 0.01% ethanol) and receptor activation was measured as an increase in luminescence signal. Results are shown as mean  $\pm$  SEM (n = 3 in two independent experiments).

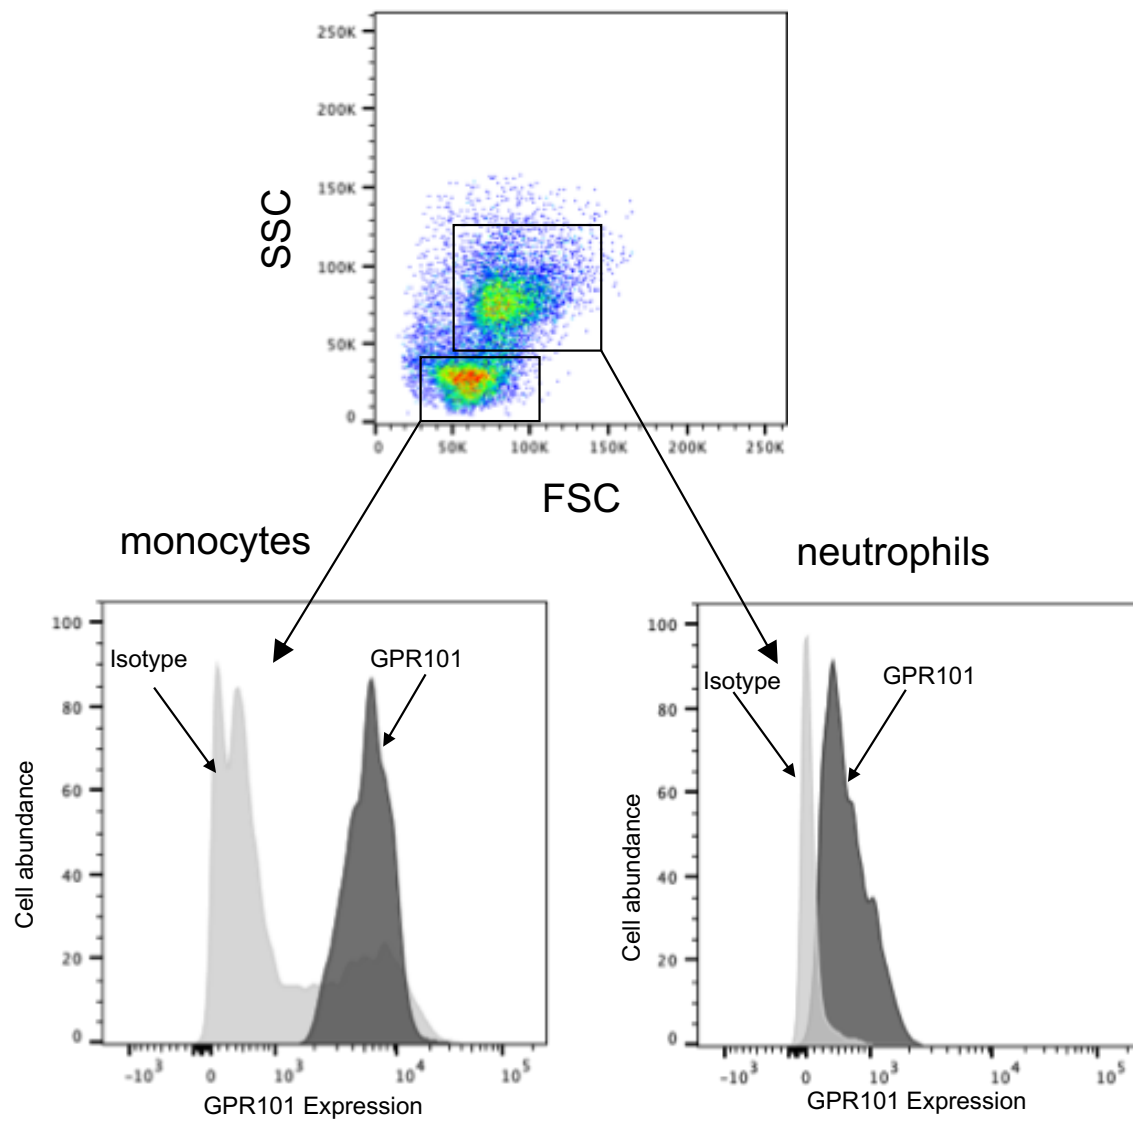

**Supplemental Figure 2: Expression of GPR101 in mouse leukocytes.** Peripheral blood was collected and the expression of GPR101 was determined in neutrophils and monocytes using flow cytometry. Results are representative of  $n = 4$  mice per group from two distinct experiments.

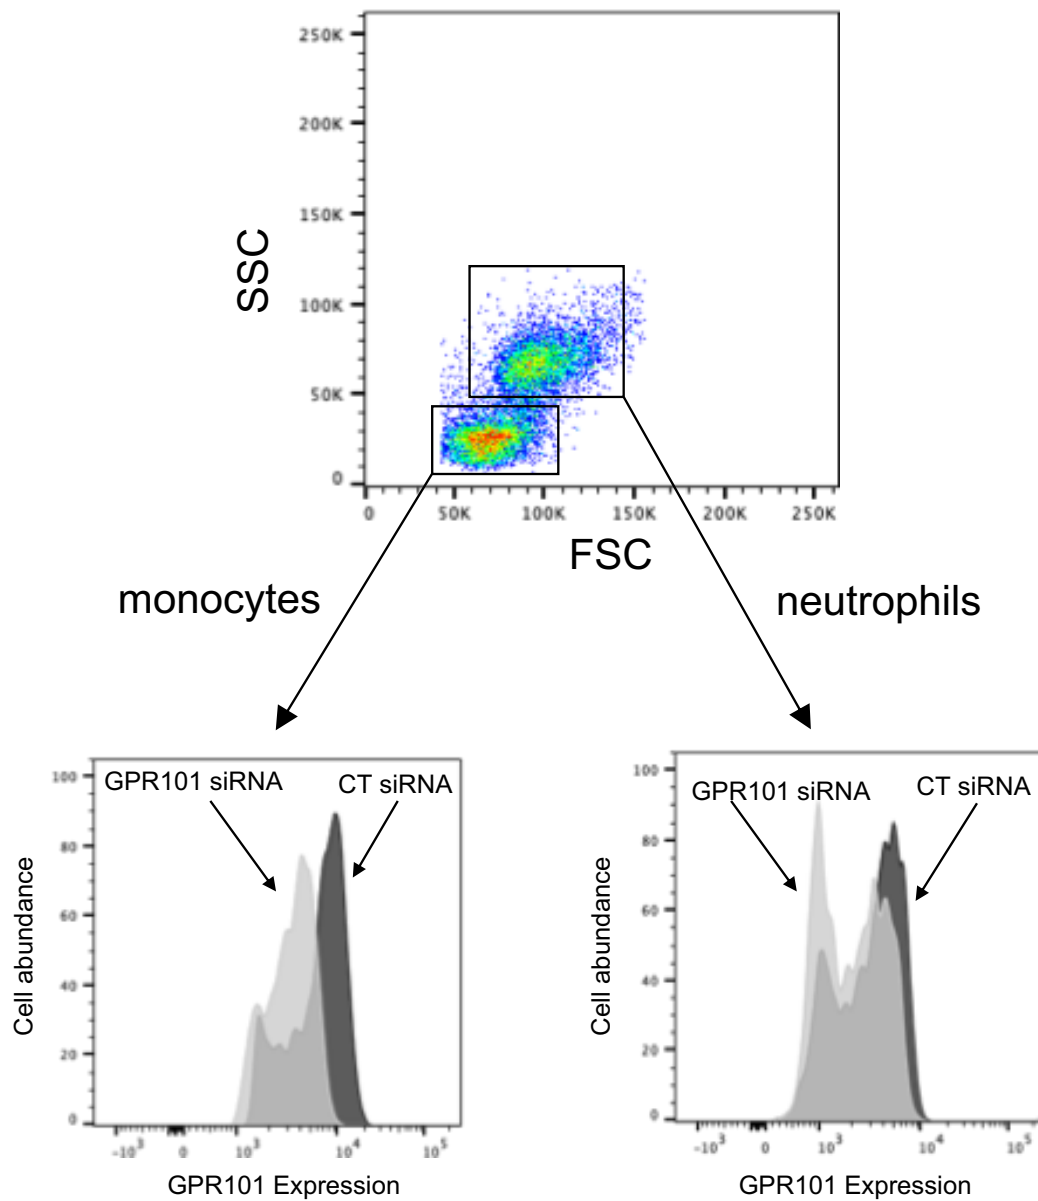

**Supplemental Figure 3: Administration of siRNA targeting GPR101 reduces receptor expression on mouse circulating neutrophils and monocytes.** Mice were administered 9  $\mu$ g of siRNA to mouse GPR101 or a scrambled control sequence (CT siRNA). After 72 h blood was collected and the expression of GPR101 was determined on neutrophils and monocytes. Results are representative of n = 4 mice per group from two distinct experiments.

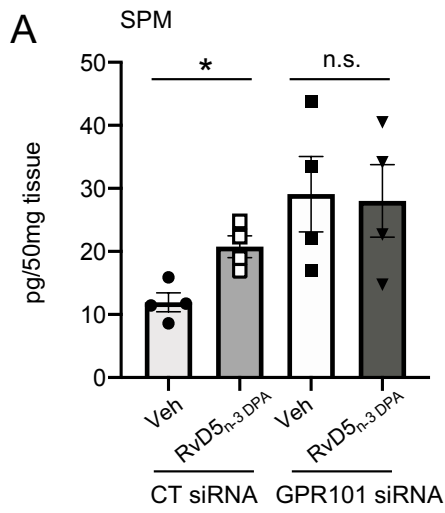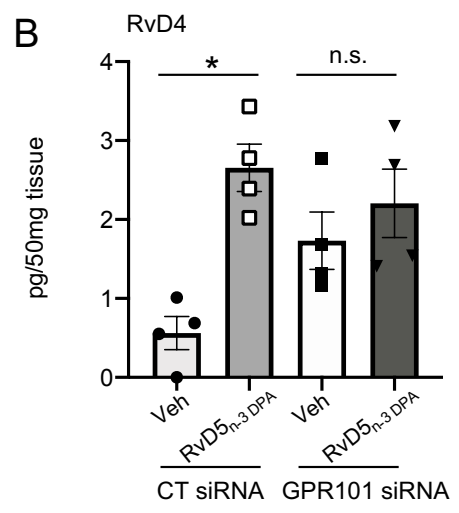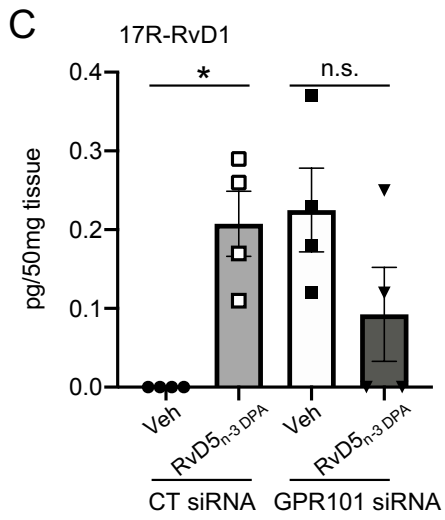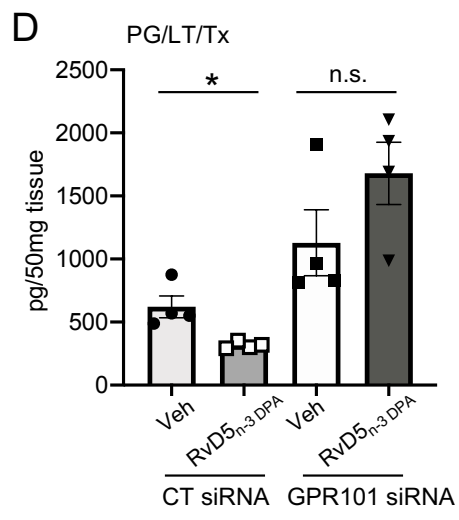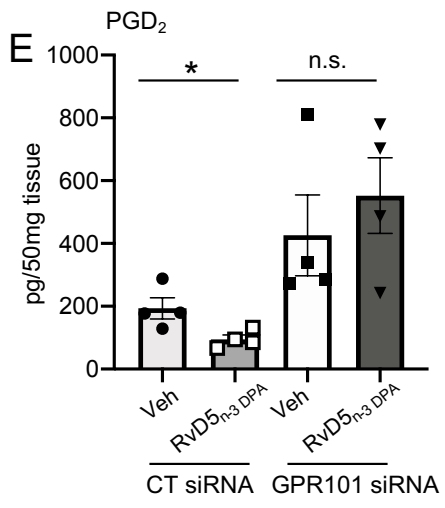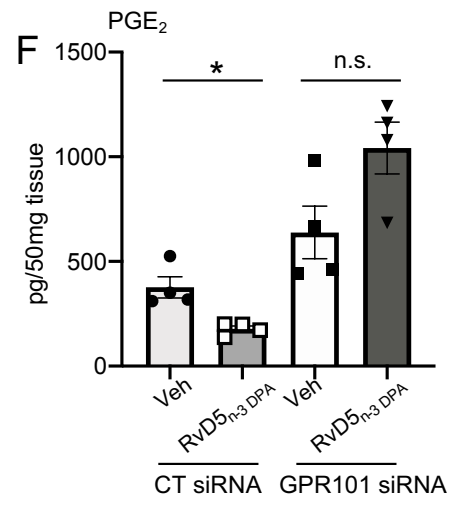

**Supplemental Figure 4: Reduction of GPR101 expression limits the ability of RvD5<sub>n-3</sub> DPA to regulate intestinal eicosanoid and SPM concentrations.** Mice were administered 9 µg of siRNA to mouse GPR101 or a scrambled control sequence (CT siRNA). After 24 h and 72 h mice were administered arthritogenic serum. Mice were then treated with RvD5<sub>n-3</sub> DPA (150ng/mouse) or vehicle (72h and 96h after siRNA administration), small intestines were collected on day 7 post serum administration and lipid mediator profiles determined using LC-MS/MS based lipid mediator profiling. Concentrations of (A) pro-resolving mediators (sum of DHA, n-3 DPA, EPA and AA derived specialized pro-resolving mediators- SPM), (B) RvD4, (C) 17R-RvD1, (D) sum of prostaglandins (PG), Leukotrienes (LT) and Thromboxane (Tx), (E) PGD<sub>2</sub>, (F) PGE<sub>2</sub>. Results are representative of n = 4 mice per group. \* P < 0.05 *versus* vehicle group using Kruskal-Wallis test with Dunn's post hoc multiple comparisons test.

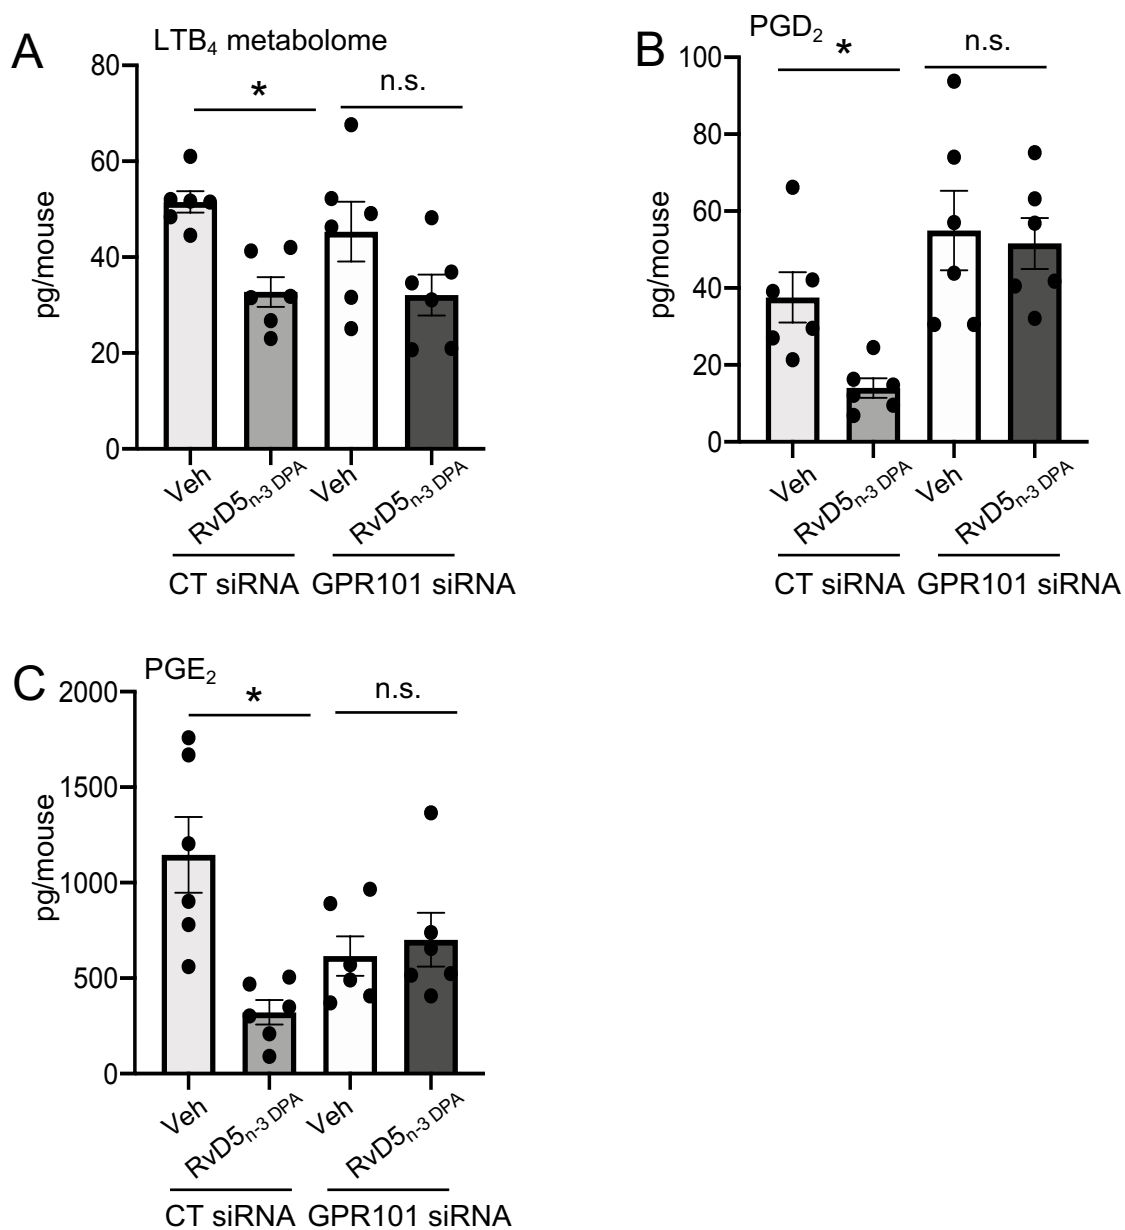

**Supplemental Figure 5: Knockdown of GPR101 limits the ability of RvD5<sub>n-3</sub> DPA to regulate**

**exudate prostaglandin and leukotriene concentrations.** Mice were administered 9 µg of siRNA to mouse GPR101 or a scrambled control sequence (CT siRNA). After 72 h they were administered RvD5<sub>n-3</sub> DPA (100ng/mouse) or vehicle control (PBS containing 0.1 % ethanol) then inoculated via intraperitoneal injection with 10<sup>5</sup> c.f.u. *E. coli*. After 14h exudates were collected



and concentrations of (A) the Leukotriene B<sub>4</sub> metabolome (LTB<sub>4</sub>, 5S, 12S-diHETE and 20-OH-LTB<sub>4</sub>), (B) PGD<sub>2</sub>, (C) PGE<sub>2</sub> were determined using LC-MS/MS based lipid mediator profiling. Results are representative of n = 6 mice per group from two distinct experiments. \* P < 0.05 *versus* vehicle group using Kruskal-Wallis test with Dunn's post hoc multiple comparisons test.

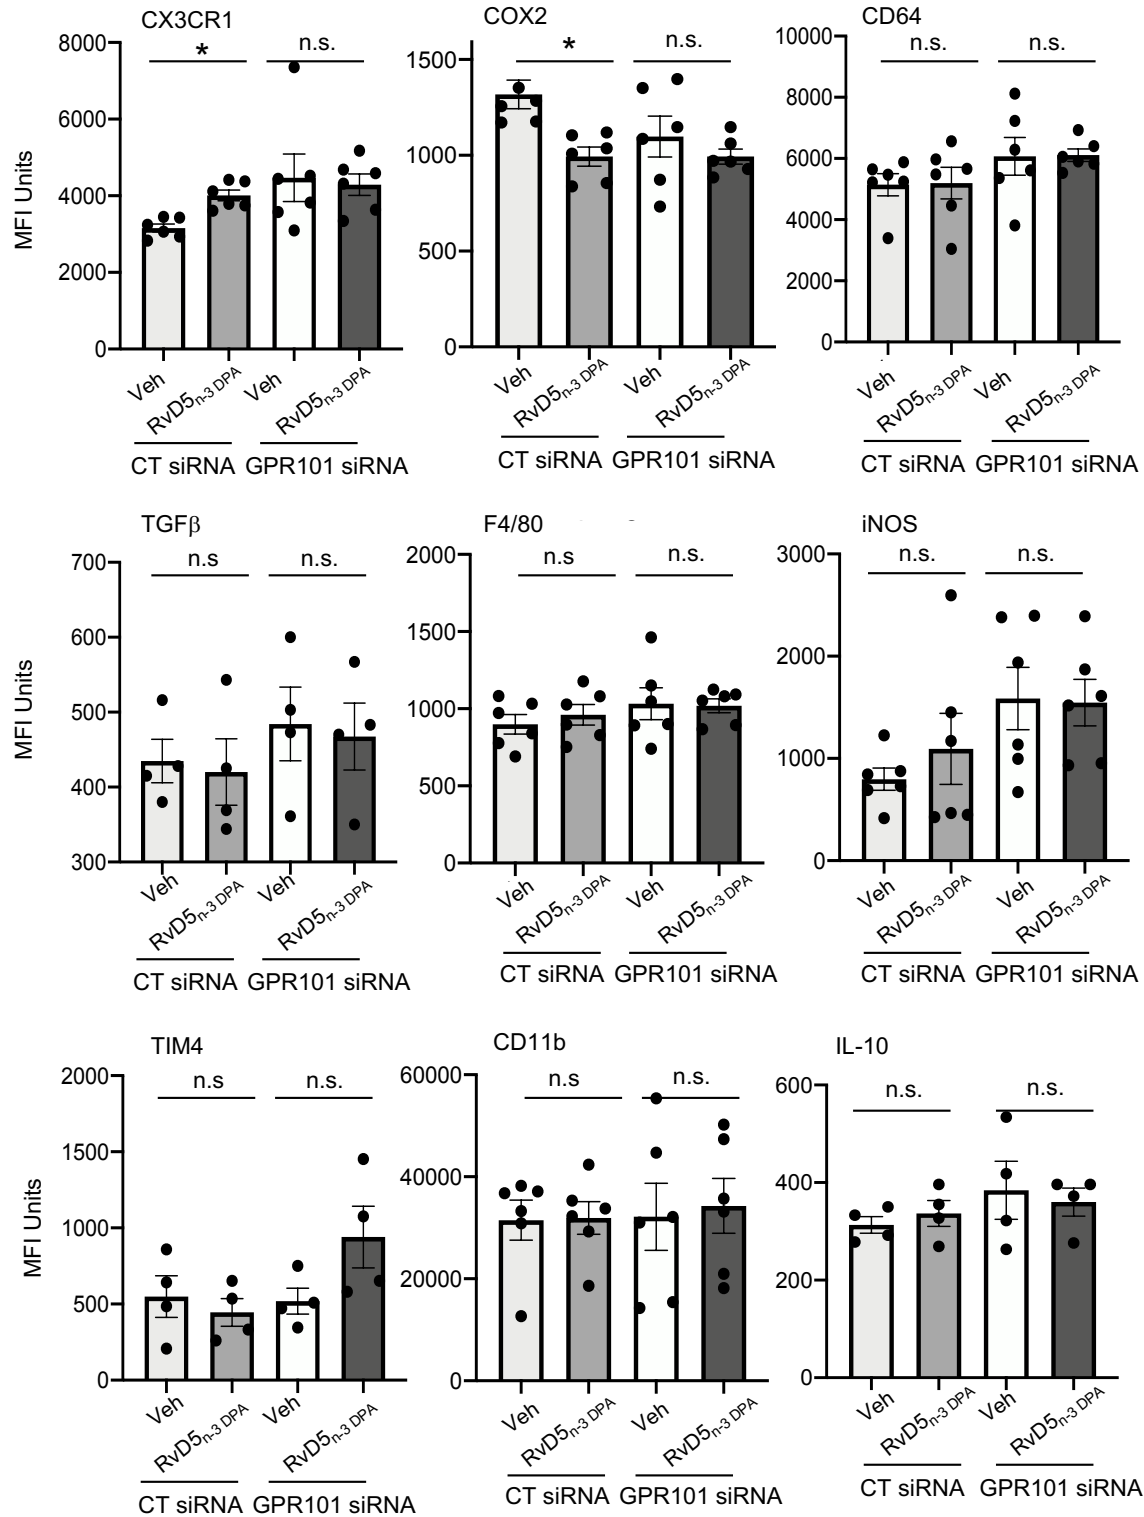

**Supplemental Figure 6: Knockdown of GPR101 limits the ability of RvD5<sub>n-3</sub> DPA to regulate exudate monocyte-derived macrophage phenotype during infectious inflammation. Mice**

were administered 9 µg of siRNA to mouse GPR101 or a scrambled control sequence (CT siRNA) after 72 h they were administered RvD5<sub>n-3</sub> DPA (100ng/mouse) or vehicle control (PBS containing 0.1 % ethanol) then inoculated with 10<sup>5</sup> c.f.u. *E. coli*. After 14h exudates were collected and the expression of macrophage lineage markers was determined using fluorescently labelled antibodies and flow cytometry. Results are representative of n = 4-6 mice per group from two distinct experiments. \*P < 0.05 *versus* vehicle group using Kruskal-Wallis test with Dunn's post hoc multiple comparisons test.

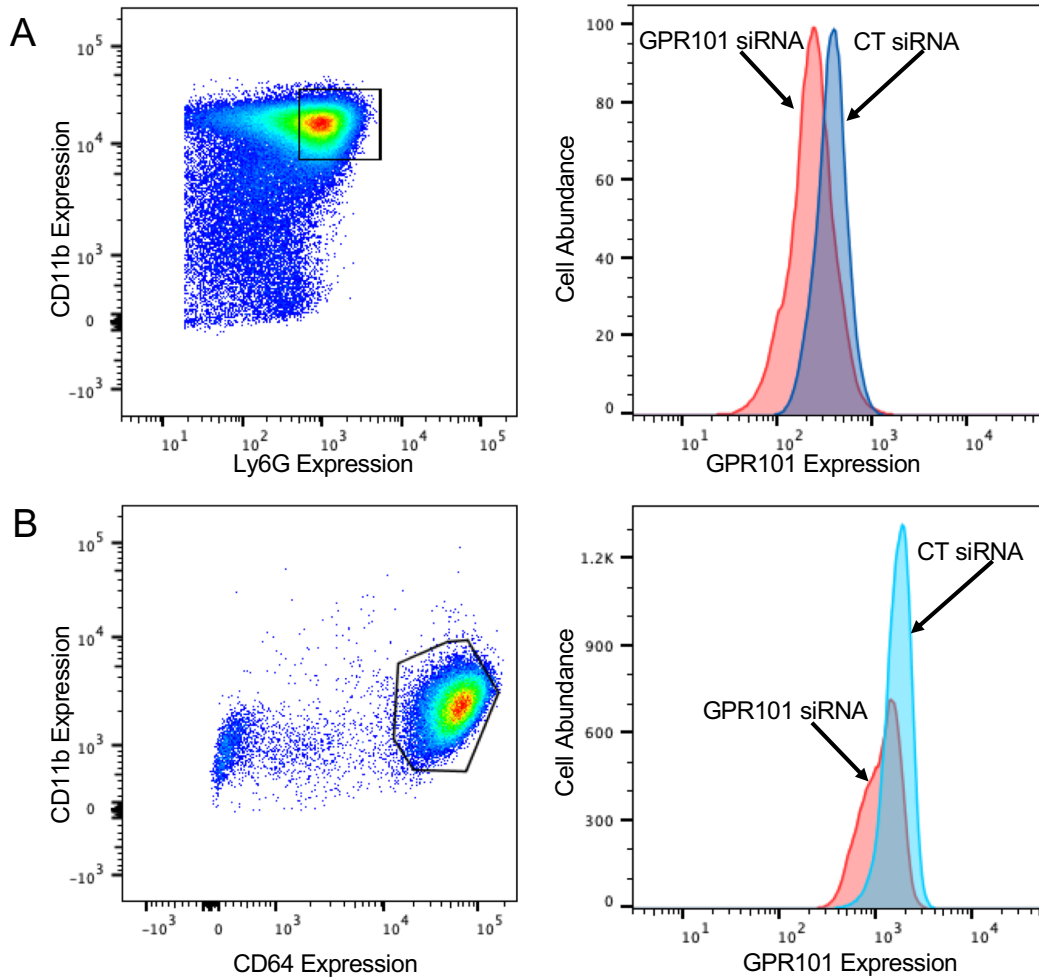

**Supplemental Figure 7: Administration of siRNA targeting GPR101 reduces receptor expression on mouse peritoneal neutrophils and macrophages during *E. coli* infections.**

Mice were administered 9  $\mu\text{g}$  of siRNA to mouse GPR101 or a scrambled control sequence (CT siRNA). After 72 h they were challenged with *E. coli* ( $10^5$  c.f.u./mouse) and exudates collected after 4h. GPR101 Expression was determined on (A) neutrophils and (B) macrophages using flow cytometry and fluorescently labelled antibodies. Results are representative of  $n = 4$  mice per group.
